# Supplementary material for: Identification and molecular mechanism study of a novel small molecule inhibitor targeting solute carrier family 7 member 11 for the treatment of hepatocellular carcinoma
Source: Royal Society of Chemistry journal article supplement (doi:10.1039/d4nj04369c), 2025-01-01
Supplement: d4nj04369c20.pdf [file d4nj04369c20.pdf]

## Supporting Information

### Identification and molecular mechanism study of novel small molecule inhibitor targeting Solute Carrier Family 7 Member 11 for the treatment of hepatocellular carcinoma

Xiaomeng Wang<sup>a,b,#</sup>, Yan Yang<sup>a,b,#</sup>, Qiao Fu<sup>a,b</sup>, Jing Luo<sup>a,b</sup>, Juan Wang<sup>a,b,c,d,e,\*</sup>

<sup>a</sup>Department of Pharmacy and Bioengineering, Chongqing University of Technology, Chongqing 400054, China

<sup>b</sup>Key Laboratory of Screening and Activity Evaluation of Targeted Drugs, Chongqing 400054, China

<sup>c</sup>Department of Pathophysiology, Third Military Medical University (Army Medical University), 400038, Chongqing, People's Republic of China

<sup>d</sup>Key Laboratory of Extreme Environmental Medicine, Ministry of Education of China, 400038 Chongqing, People's Republic of China

<sup>e</sup>Key Laboratory of High Altitude Medicine, PLA, 400038 Chongqing, People's Republic of China

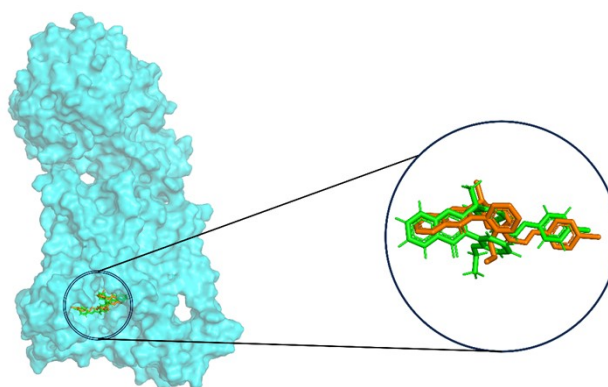

**Figure S1.** The result of re-docking. Original conformation(orange), The conformation of the re-docking(green)

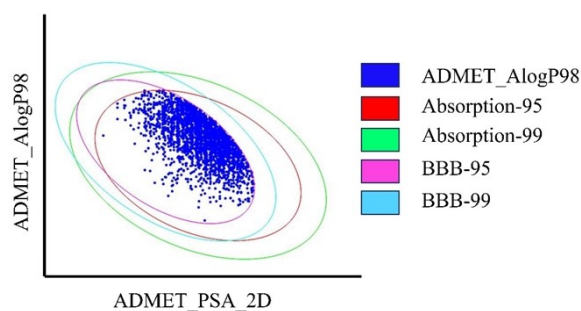

**Figure S2.** The ADME/T results.

---

\* Corresponding authors.

Email: [juanwang@cqut.edu.cn](mailto:juanwang@cqut.edu.cn) (Juan Wang)

# These authors contributed equally to this work.

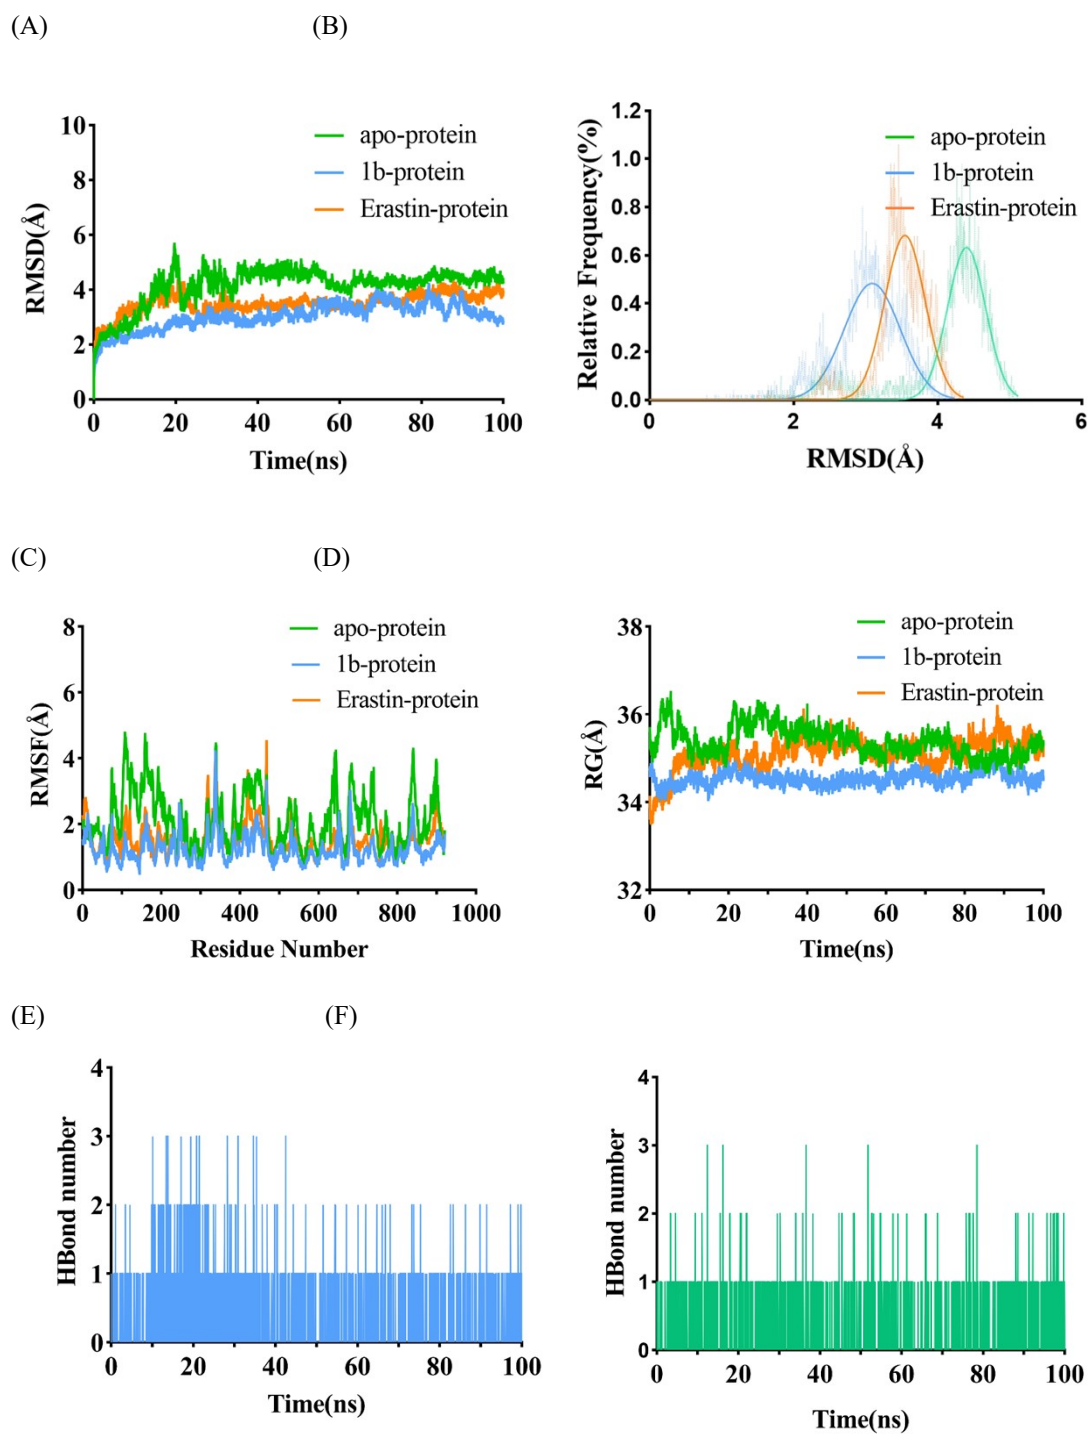

**Figure S3.** 1b could bind closely with SLC7A11. (A-B) RMSD of  $\alpha$ C for apo/1b /Erastin-protein systems. (C) RMSF of each residue for apo/1b/Erastin-protein systems. (D)RG values of apo/1b/Erastin-protein systems. (E) The number of hydrogen bonds for 1b-SLC7A11. (F) The number of hydrogen bonds for Erastin-SLC7A11.

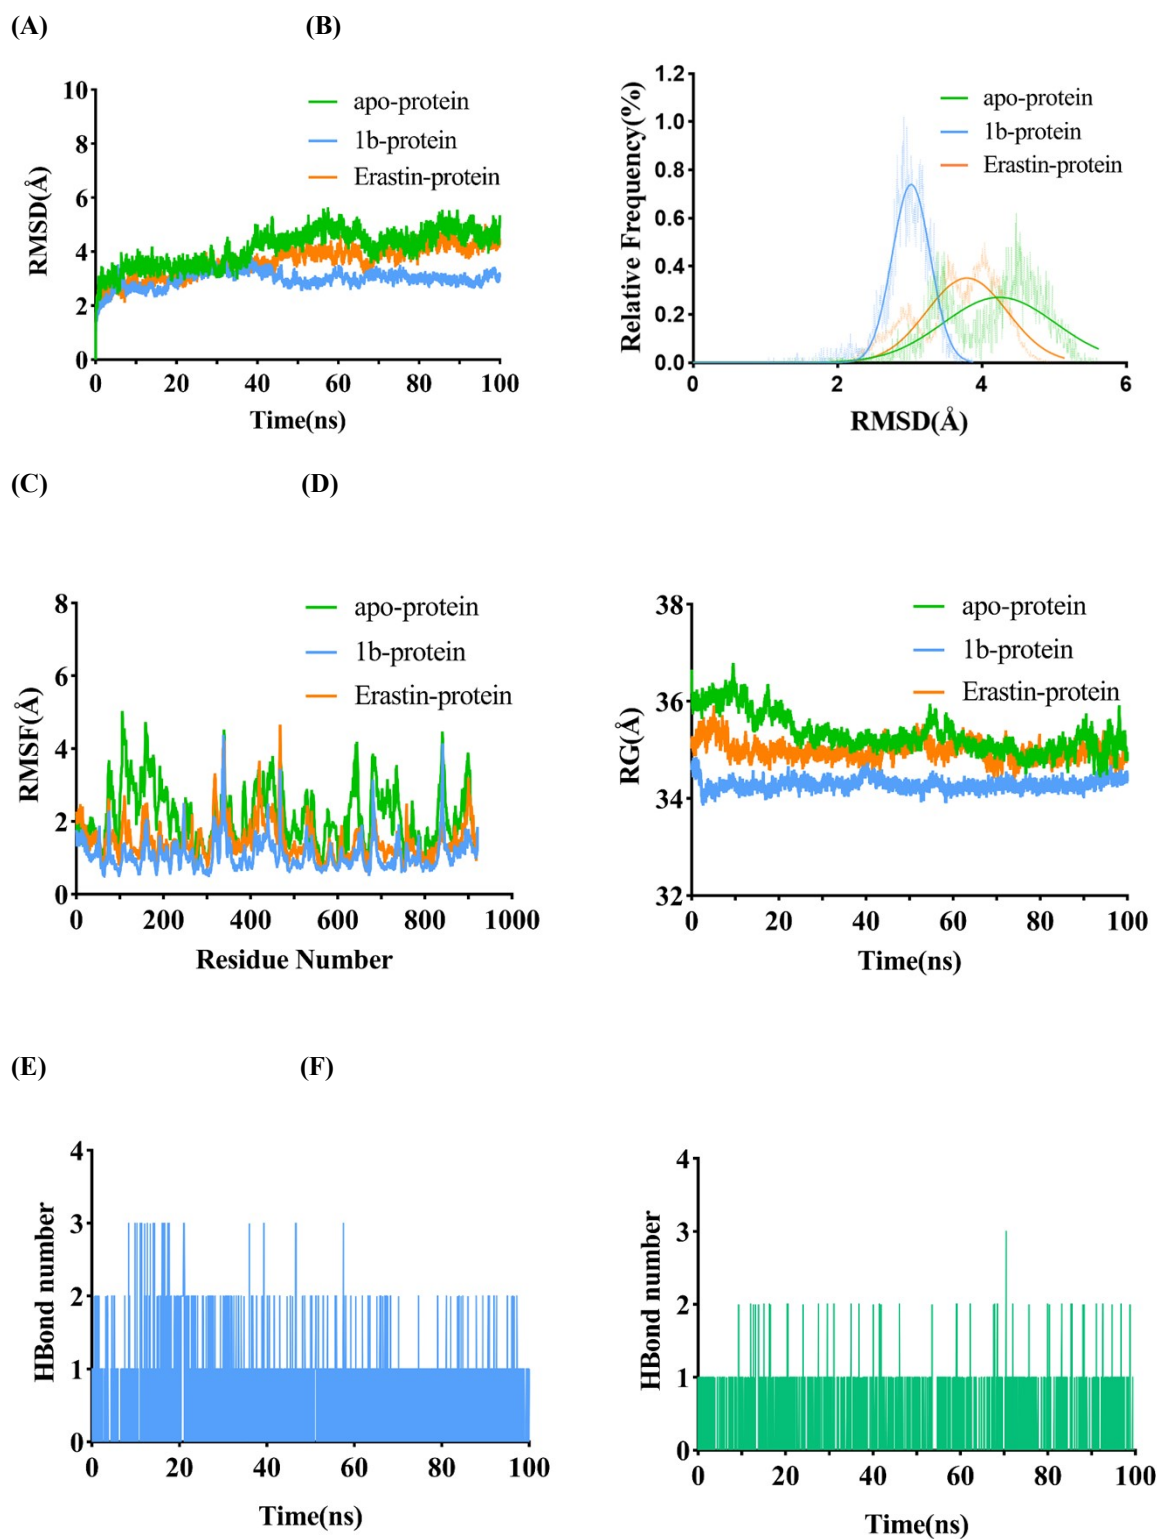

**Figure S4.** 1b could bind closely with SLC7A11. (A-B) RMSD of  $\alpha$ C for apo/1b /Erastin-protein systems. (C) RMSF of each residue for apo/1b/Erastin-protein systems. (D)RG values of apo/1b/Erastin-protein systems. (E) The number of hydrogen bonds for 1b-SLC7A11. (F) The number of hydrogen bonds for Erastin-SLC7A11.

**Table S1.** The binding free energy for 1b/Erastin-SLC7A11 (kcal/mol)

| system          | Polar contributions     |                             | Non-polar contributions |                                | $\Delta G_{\text{bind}}$ |
|-----------------|-------------------------|-----------------------------|-------------------------|--------------------------------|--------------------------|
|                 | $\Delta G_{\text{ele}}$ | $\Delta G_{\text{ele,sol}}$ | $\Delta G_{\text{vdw}}$ | $\Delta G_{\text{nonpol,sol}}$ |                          |
| 1b-SLC7A11      | -23.133                 | 36.688                      | -46.067                 | -5.671                         | -38.183                  |
| Erastin-SLC7A11 | -2.667                  | 18.139                      | -38.525                 | -4.928                         | -27.981                  |

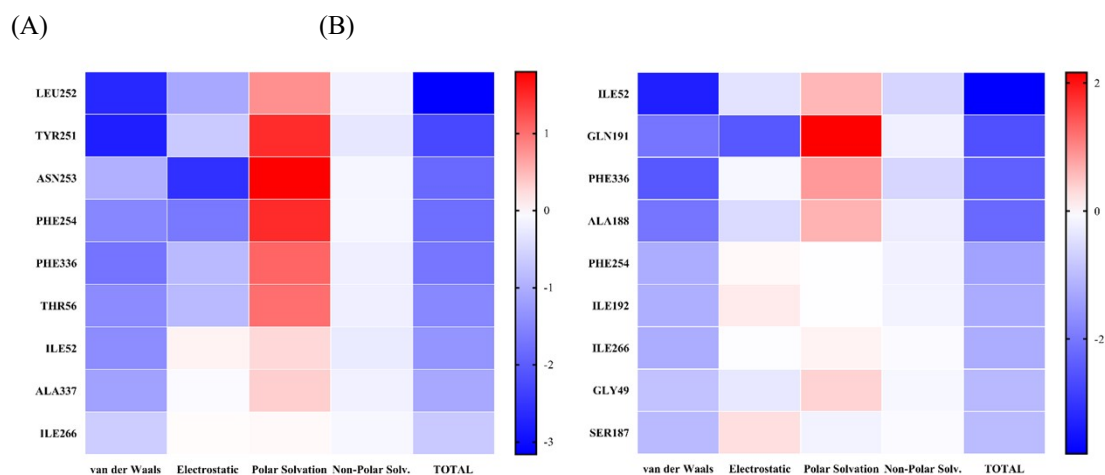**Figure S5.** The free energy contribution of key residues. (A) 1b-protein. (B) Erastin-protein.**Table S2.** The binding free energy for 1b/Erastin-SLC7A11 (kcal/mol)

| system          | Polar contributions     |                             | Non-polar contributions |                                | $\Delta G_{\text{bind}}$ |
|-----------------|-------------------------|-----------------------------|-------------------------|--------------------------------|--------------------------|
|                 | $\Delta G_{\text{ele}}$ | $\Delta G_{\text{ele,sol}}$ | $\Delta G_{\text{vdw}}$ | $\Delta G_{\text{nonpol,sol}}$ |                          |
| 1b-SLC7A11      | -23.778                 | 36.686                      | -46.129                 | -5.616                         | -38.837                  |
| Erastin-SLC7A11 | -3.149                  | 18.752                      | -39.117                 | -4.900                         | -28.414                  |

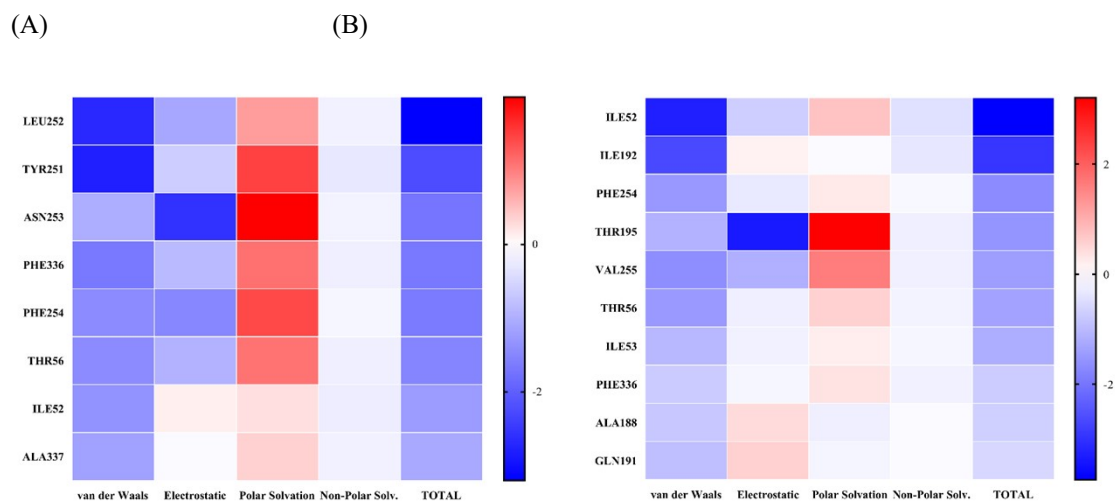**Figure S6.** The free energy contribution of key residues. (A) 1b-protein. (B) Erastin-protein.
