# Supplementary material for: Identification and molecular mechanism study of a novel small molecule inhibitor targeting solute carrier family 7 member 11 for the treatment of hepatocellular carcinoma
Source: Royal Society of Chemistry journal article supplement (doi:10.1039/d4nj04369c), 2025-01-01
Supplement: d4nj04369c21.pdf [file d4nj04369c21.pdf]

**Table S1.** The binding free energy for 1b/Erastin-SLC7A11 (kcal/mol)

| system          | Polar contributions     |                             | Non-polar contributions |                                | $\Delta G_{\text{bind}}$ |
|-----------------|-------------------------|-----------------------------|-------------------------|--------------------------------|--------------------------|
|                 | $\Delta G_{\text{ele}}$ | $\Delta G_{\text{ele,sol}}$ | $\Delta G_{\text{vdw}}$ | $\Delta G_{\text{nonpol,sol}}$ |                          |
| 1b-SLC7A11      | -23.133                 | 36.688                      | -46.067                 | -5.671                         | -38.183                  |
| Erastin-SLC7A11 | -2.667                  | 18.139                      | -38.525                 | -4.928                         | -27.981                  |
