# Supplementary figures and images for: Identification and molecular mechanism study of a novel small molecule inhibitor targeting solute carrier family 7 member 11 for the treatment of hepatocellular carcinoma
Source: Royal Society of Chemistry journal article supplement (doi:10.1039/d4nj04369c), 2025-01-01

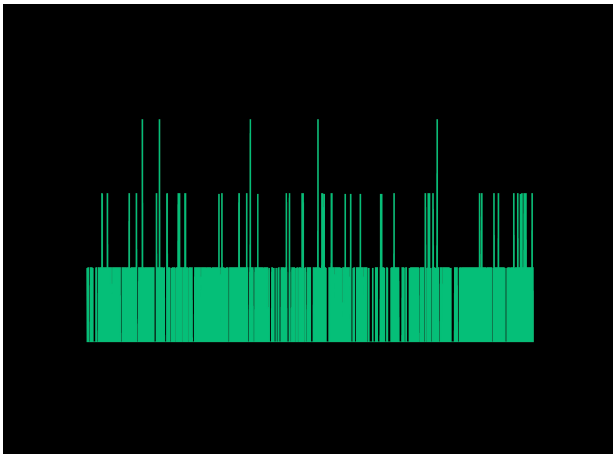

Supplement: d4nj04369c10.pdf [file d4nj04369c10.pdf]

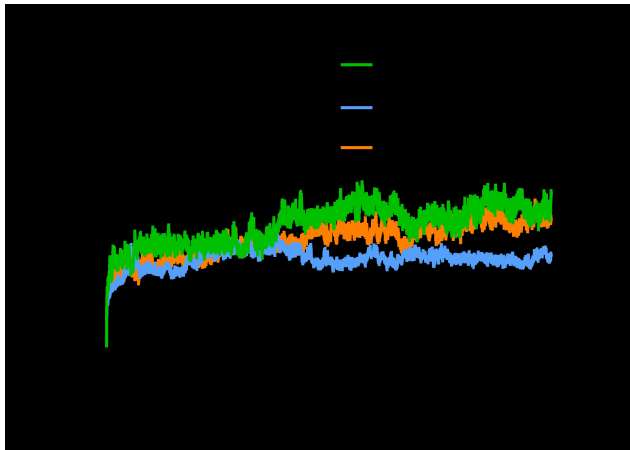

Supplement: d4nj04369c11.pdf [file d4nj04369c11.pdf]

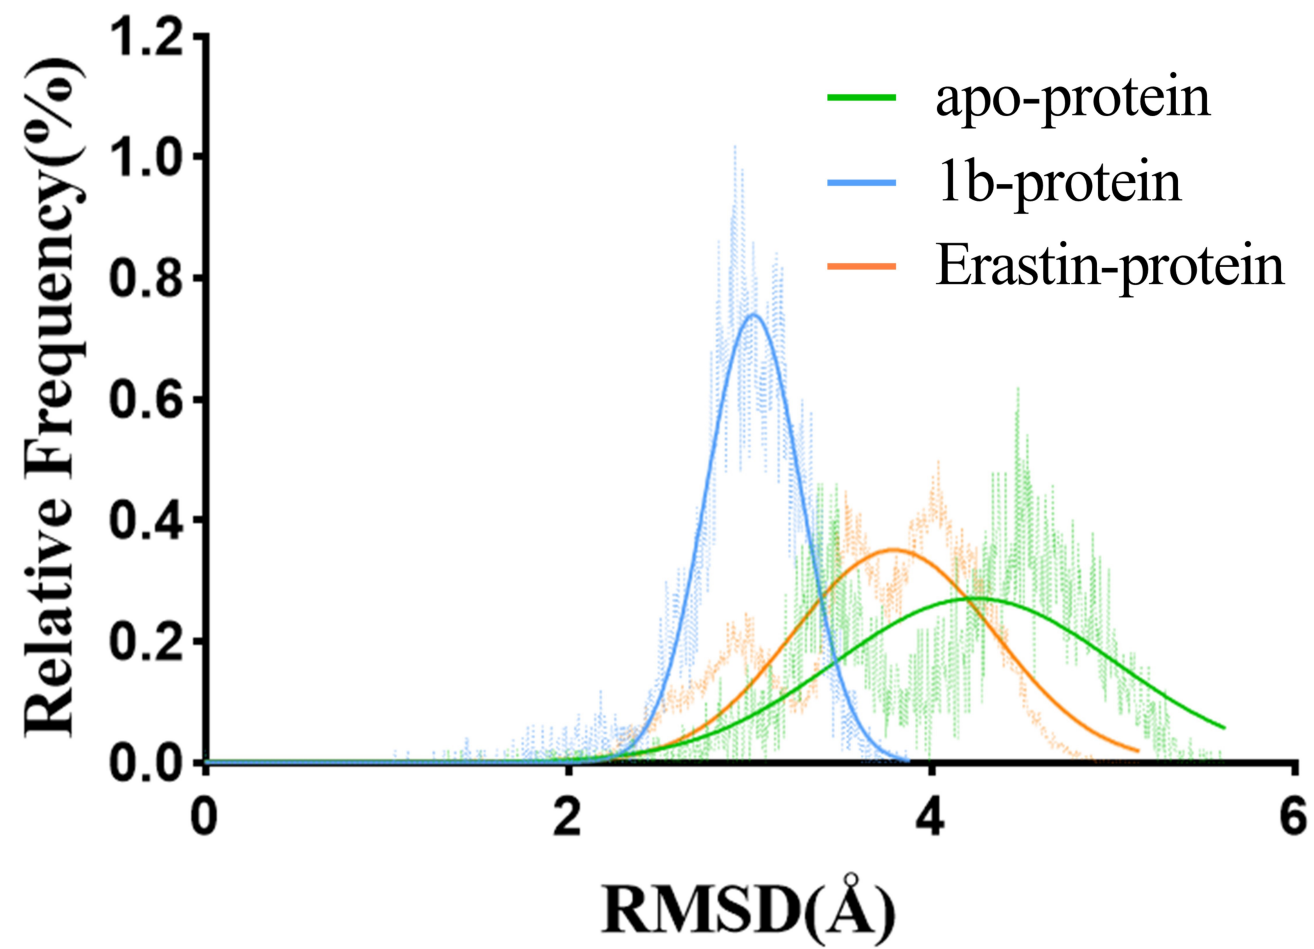

Supplement: d4nj04369c12.pdf [file d4nj04369c12.pdf]

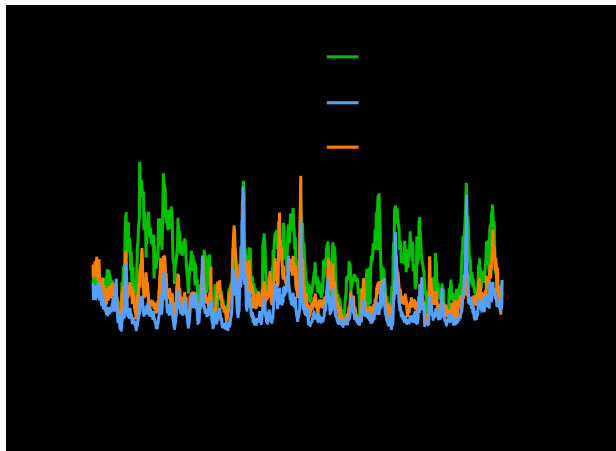

Supplement: d4nj04369c13.pdf [file d4nj04369c13.pdf]

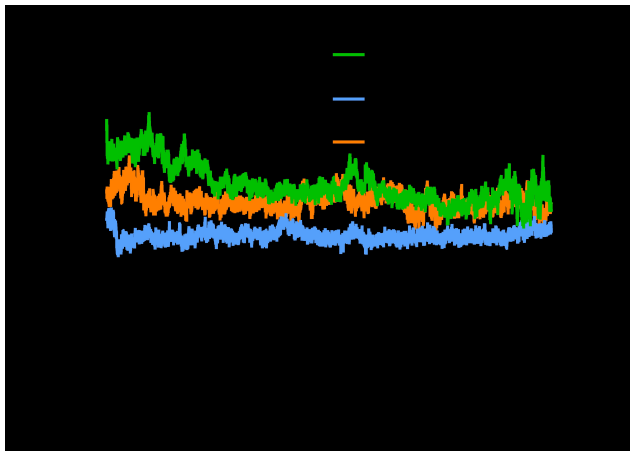

Supplement: d4nj04369c14.pdf [file d4nj04369c14.pdf]

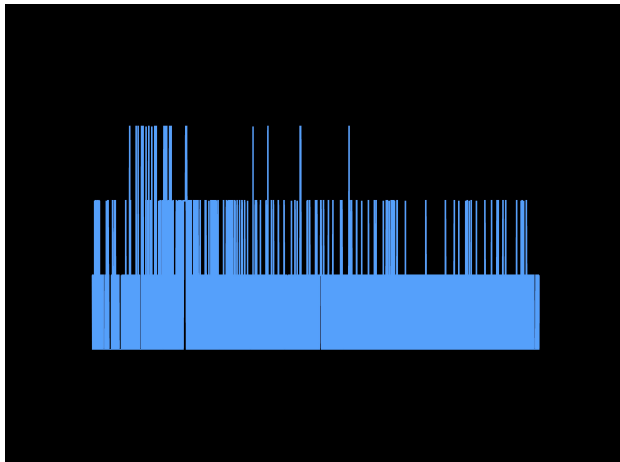

Supplement: d4nj04369c15.pdf [file d4nj04369c15.pdf]

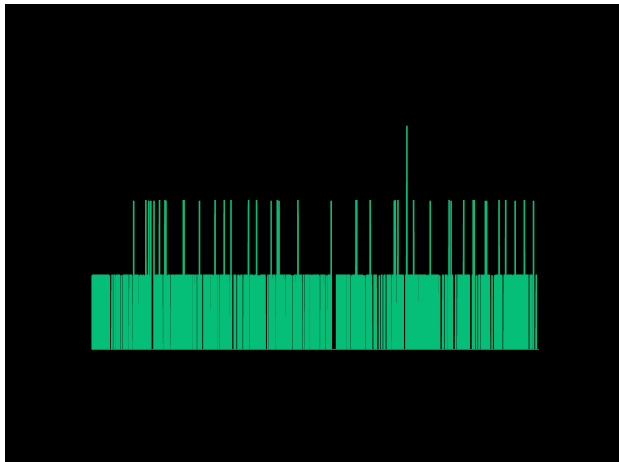

Supplement: d4nj04369c16.pdf [file d4nj04369c16.pdf]

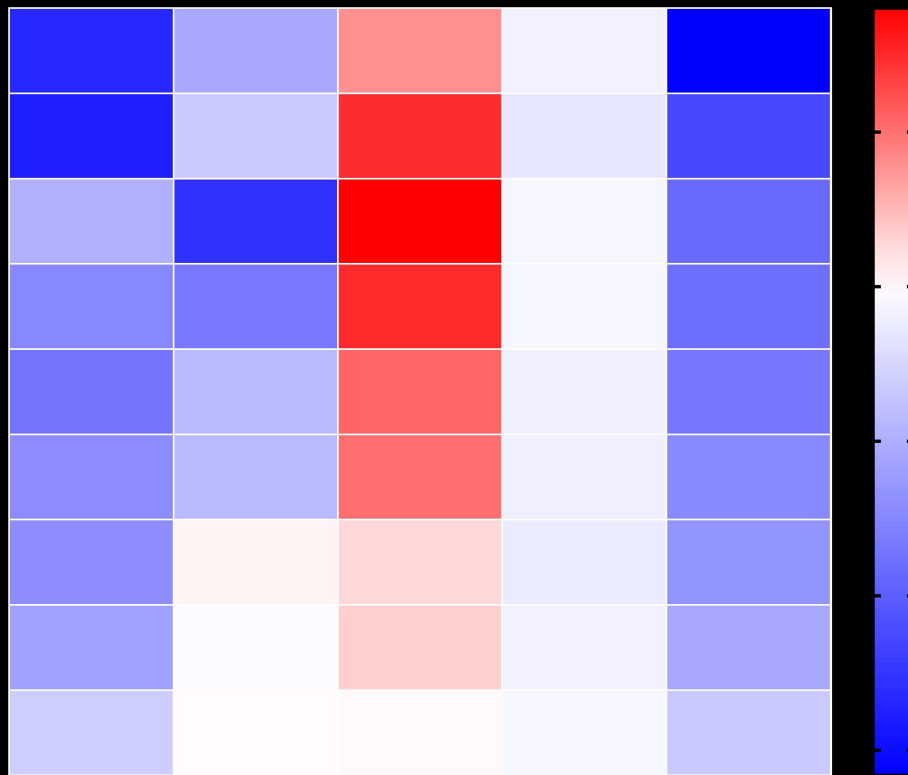

Supplement: d4nj04369c17.pdf [file d4nj04369c17.pdf]

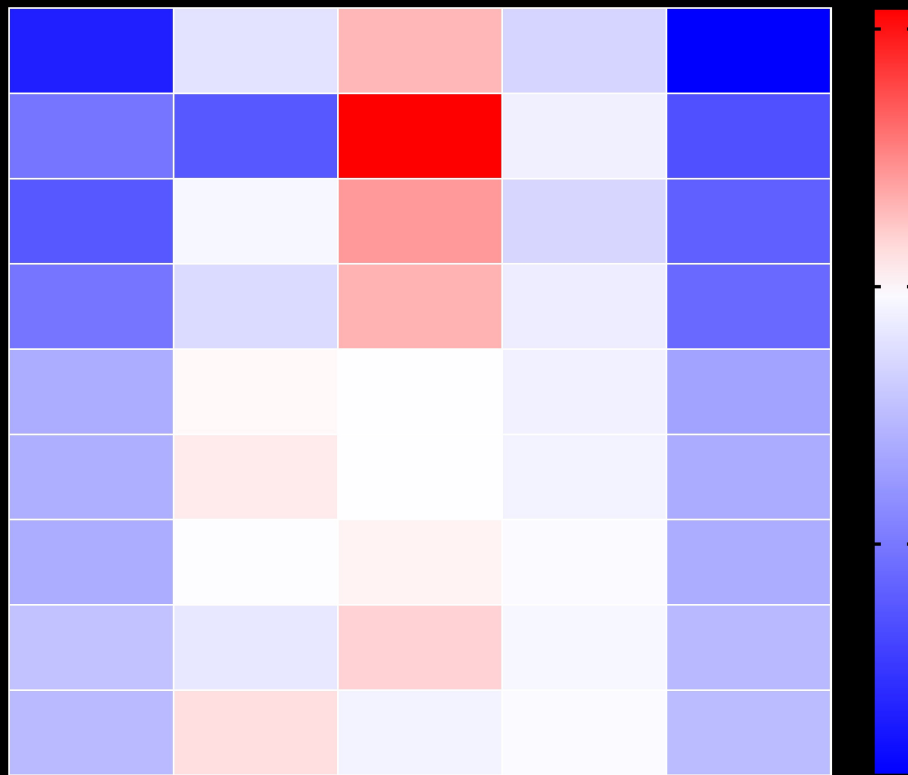

Supplement: d4nj04369c18.pdf [file d4nj04369c18.pdf]

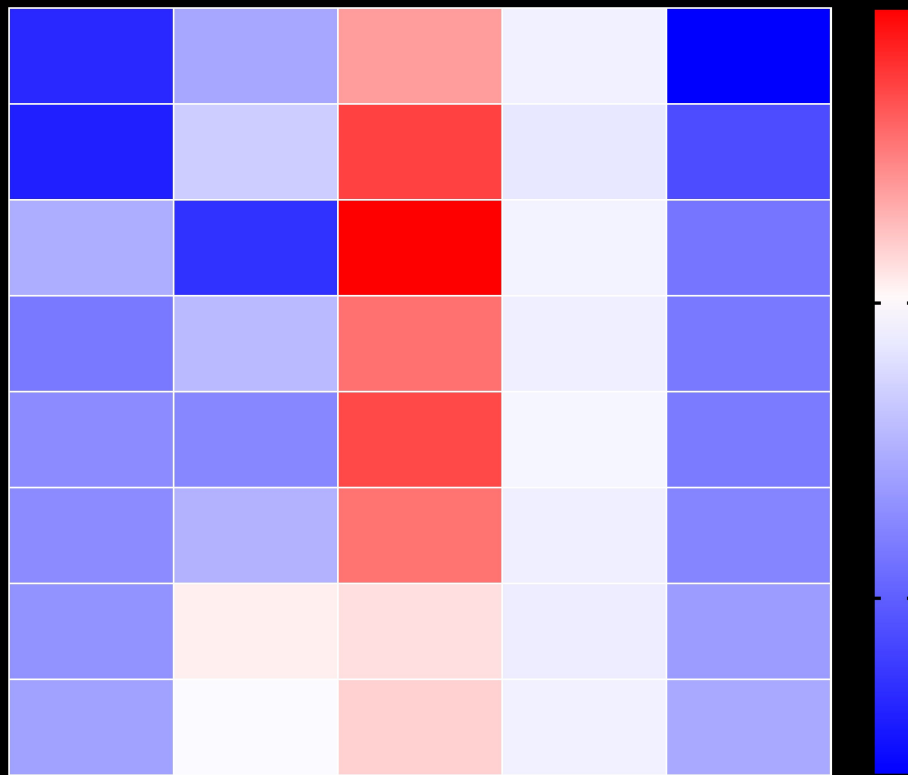

Supplement: d4nj04369c19.pdf [file d4nj04369c19.pdf]

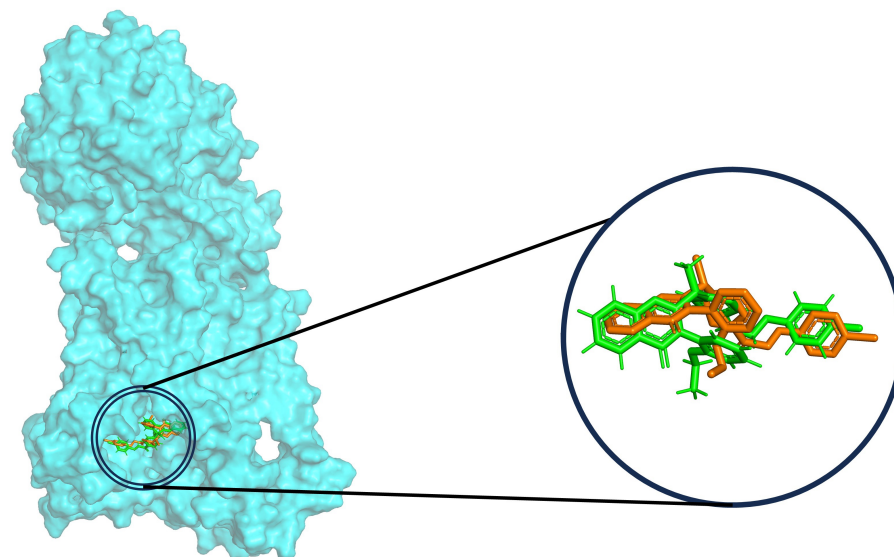

Supplement: d4nj04369c2.pdf [file d4nj04369c2.pdf]

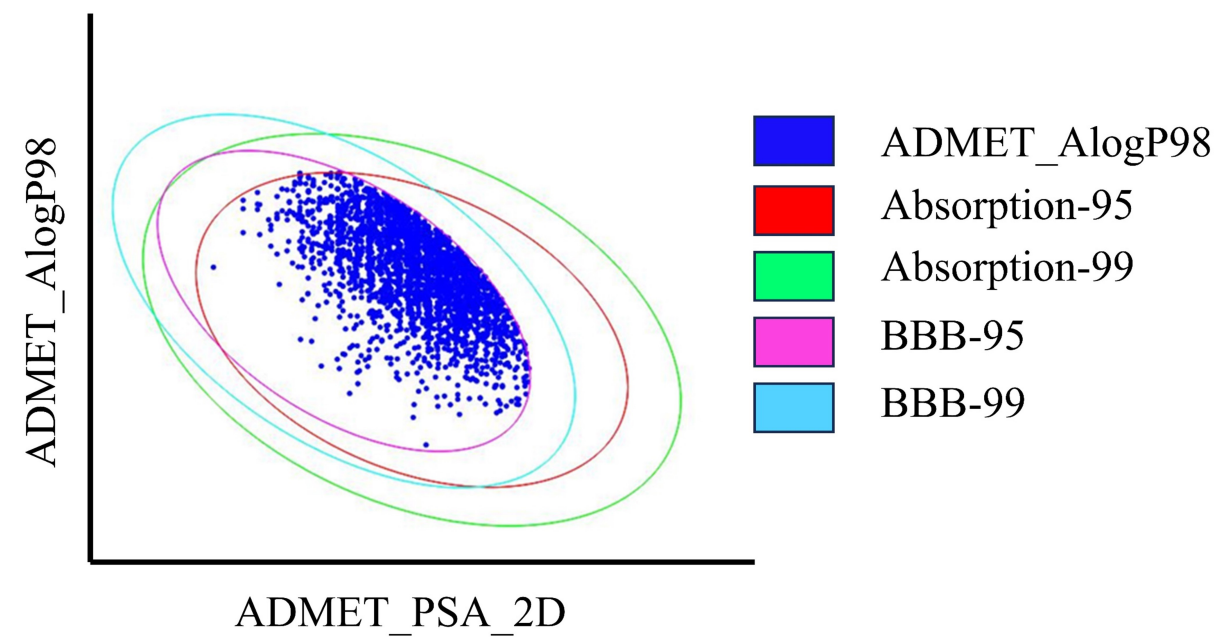

Supplement: d4nj04369c3.pdf [file d4nj04369c3.pdf]

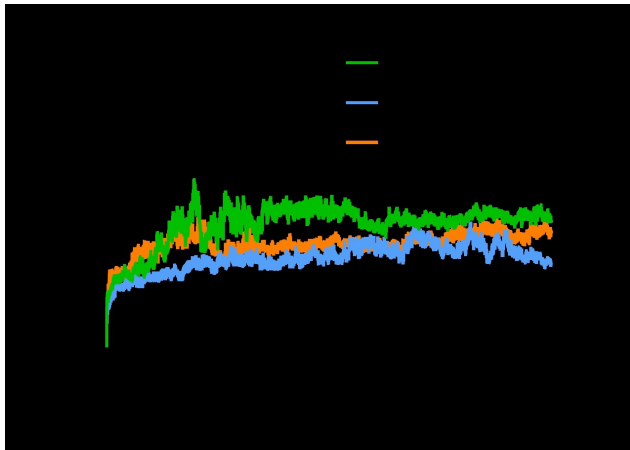

Supplement: d4nj04369c4.pdf [file d4nj04369c4.pdf]

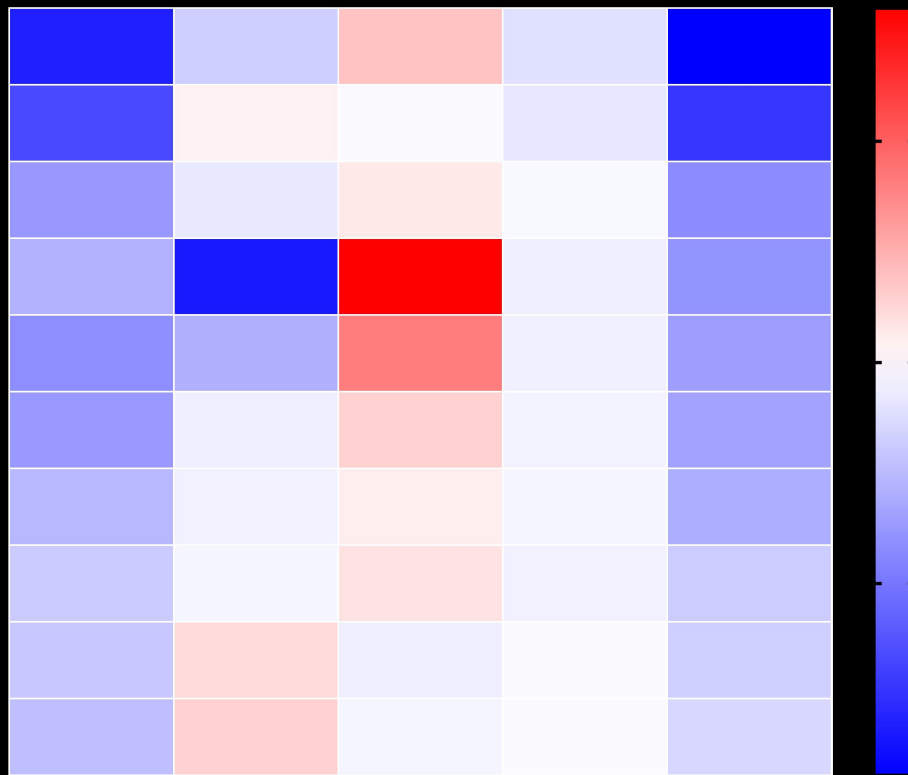

Supplement: d4nj04369c5.pdf [file d4nj04369c5.pdf]

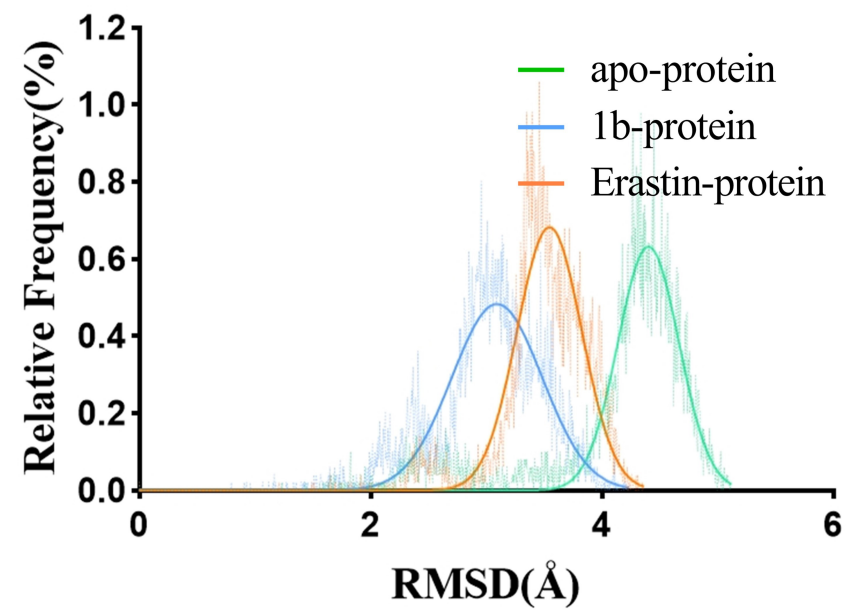

Supplement: d4nj04369c6.pdf [file d4nj04369c6.pdf]

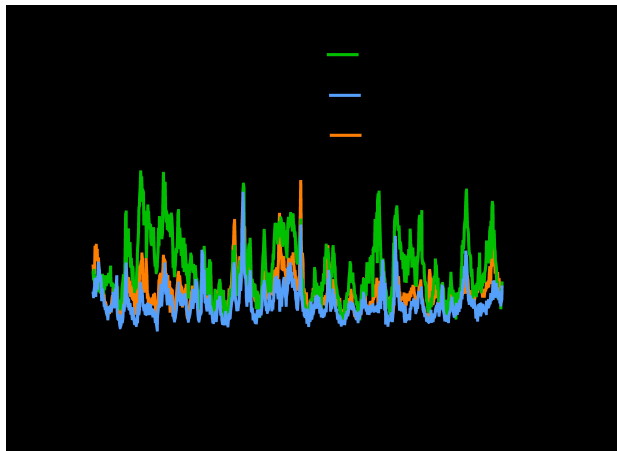

Supplement: d4nj04369c7.pdf [file d4nj04369c7.pdf]

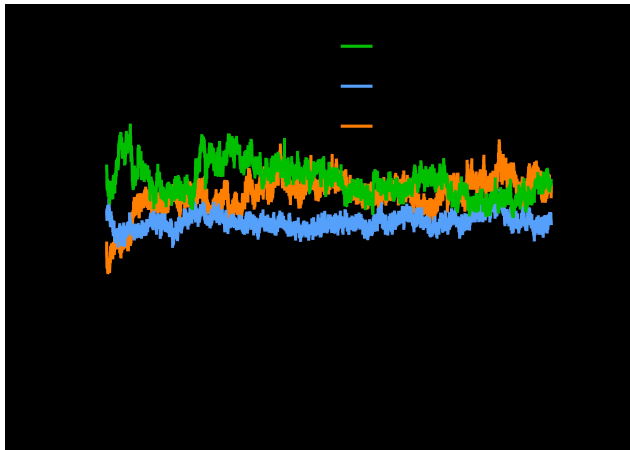

Supplement: d4nj04369c8.pdf [file d4nj04369c8.pdf]

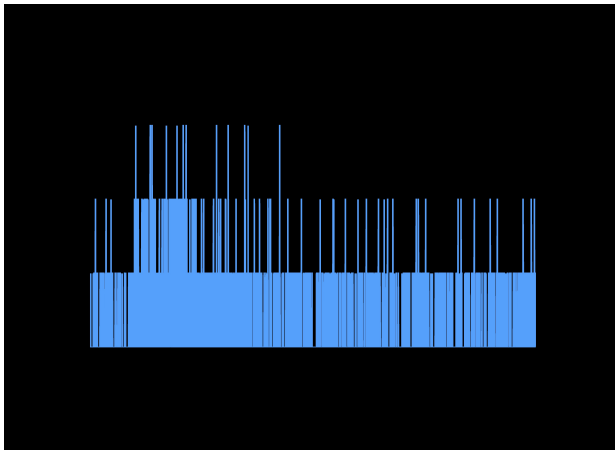

Supplement: d4nj04369c9.pdf [file d4nj04369c9.pdf]
